# Supplementary material for: Surface regulation enables high stability of single-crystal lithium-ion cathodes at high voltage
Source: Nat Commun. 2020 Jun 16;11:3050. doi: 10.1038/s41467-020-16824-2 (PMC7298058; doi:10.1038/s41467-020-16824-2)
Supplement: Supplementary file 1 — Supplementary Information [file 41467_2020_16824_MOESM1_ESM.pdf]

*Supplementary Information*

**Surface regulation enables high stability of single-crystal  
lithium-ion cathodes at high voltage**

*Zhang et al.*

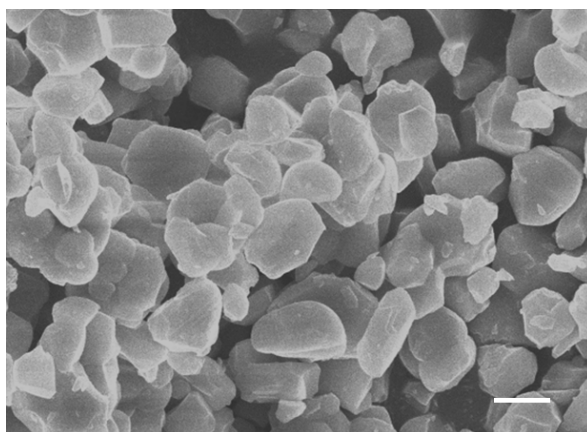

**Supplementary Figure 1. Morphological analysis of single-crystal NCM.** Low-resolution SEM image of NCM. Scale bar 2  $\mu\text{m}$ .

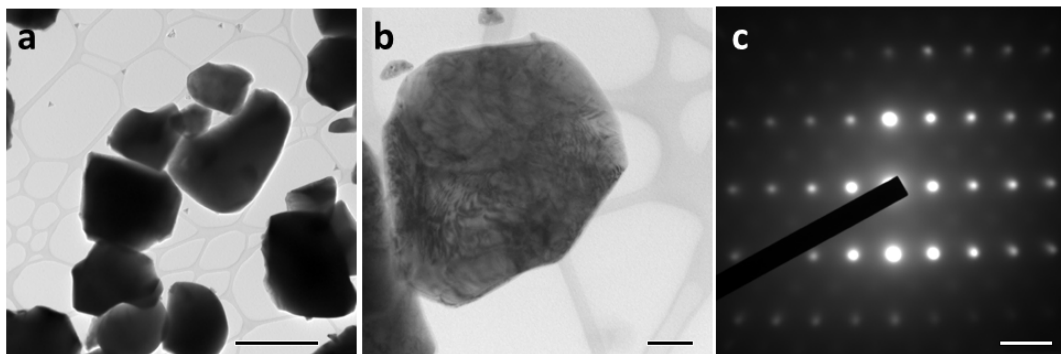

**Supplementary Figure 2. Morphological analysis of NCM.** **a** Low-resolution TEM BF images. Scale bar 2  $\mu\text{m}$ . **b** and **c** BF-TEM image and the corresponding SAED pattern. Scale bar 200 nm, 5 nm.

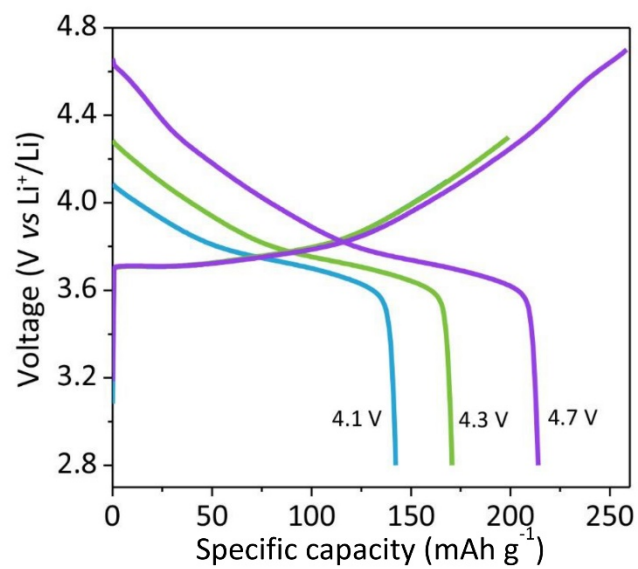

**Supplementary Figure 3. Electrochemical performance of NCM.** Initial charge-discharge profiles of NCM at 0.1 C under different cut-off voltages. (4.1 V, 4.3 V, 4.7 V).

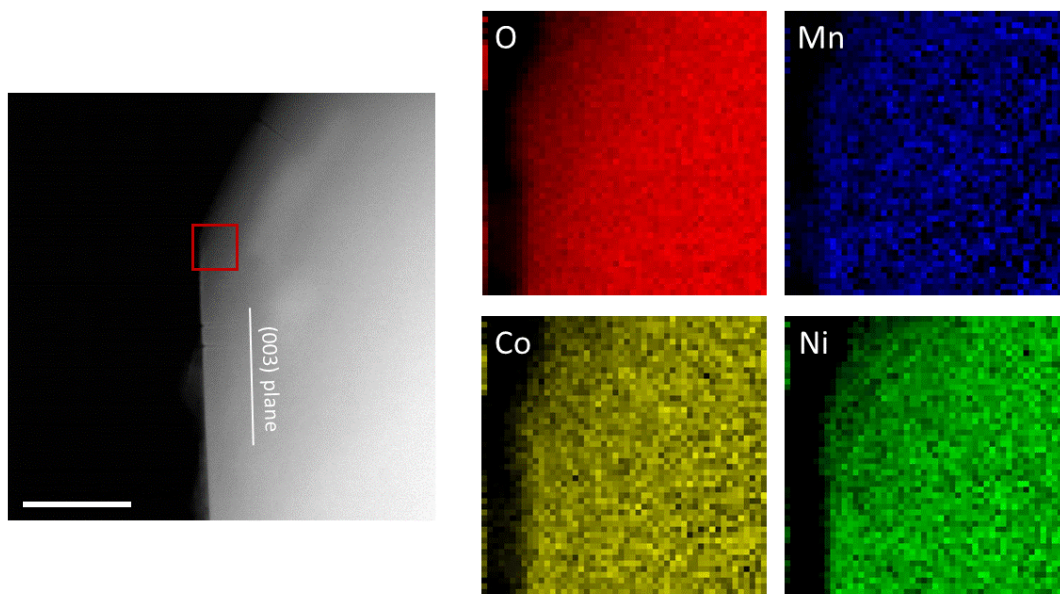

**Supplementary Figure 4. Surface element analysis of NCM.** HAADF-STEM-EDS mapping images of the pristine NCM. Scale bar 50 nm.

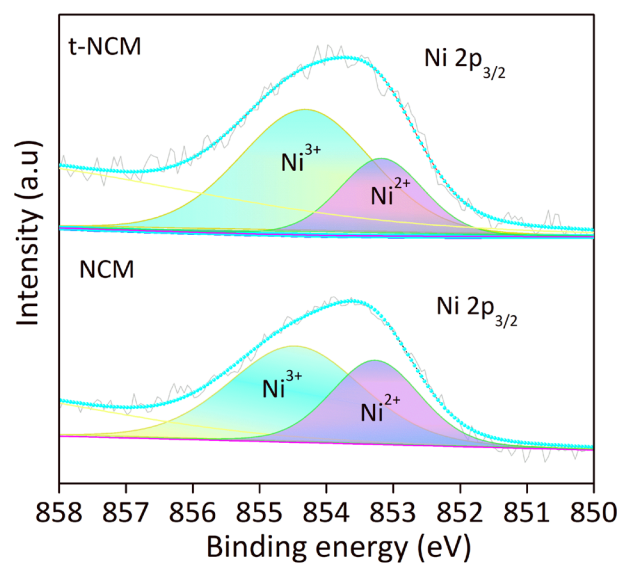

**Supplementary Figure 5. Surface chemical analysis of pristine NCM and t-NCM.** XPS profiles of pristine Ni 2p in NCM and t-NCM.

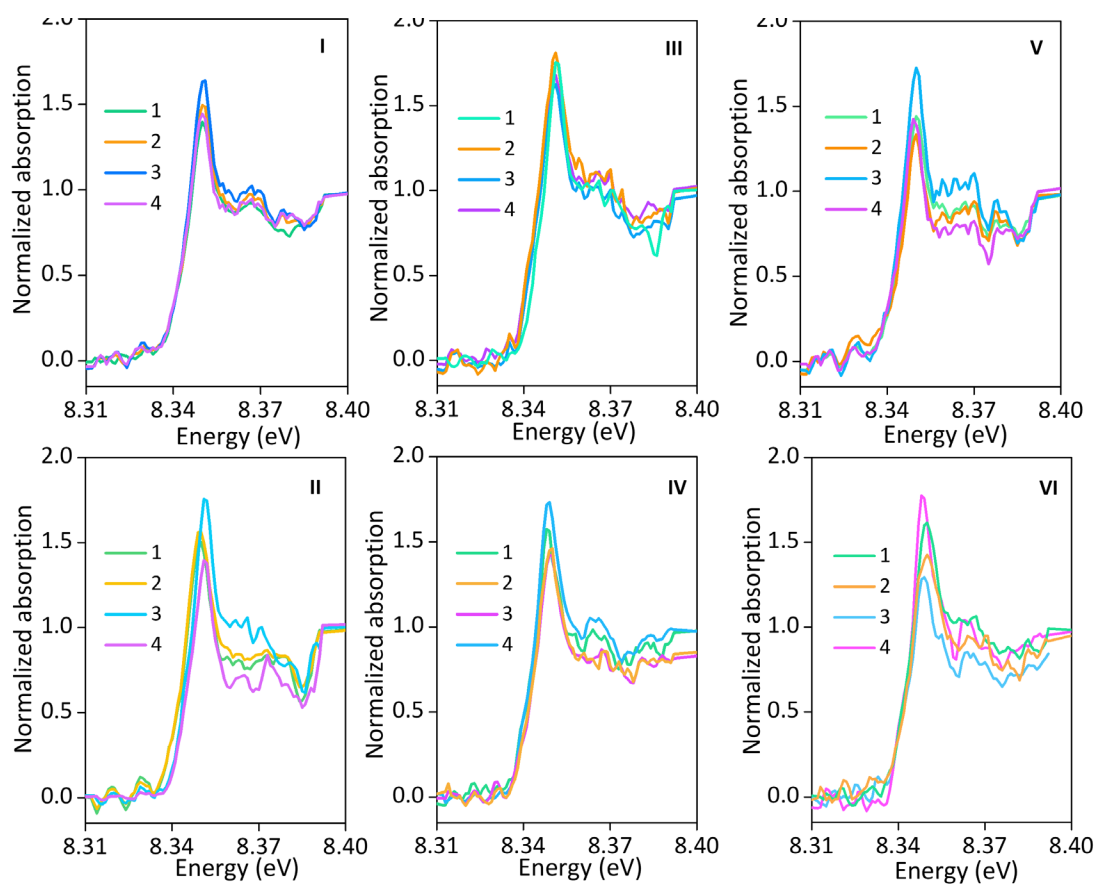

**Supplementary Figure 6. Quantitative analysis of phase distribution.** *Operando* 2D TXM-XANES

(X-ray absorption near-edge structure) during the first and 201<sup>st</sup> cycle. 1<sup>st</sup> (I, pristine; III, 4.7 V; V, 3.6 V), and 201<sup>st</sup> cycle (II, pristine; IV, 4.7 V; VI, 3.6 V).

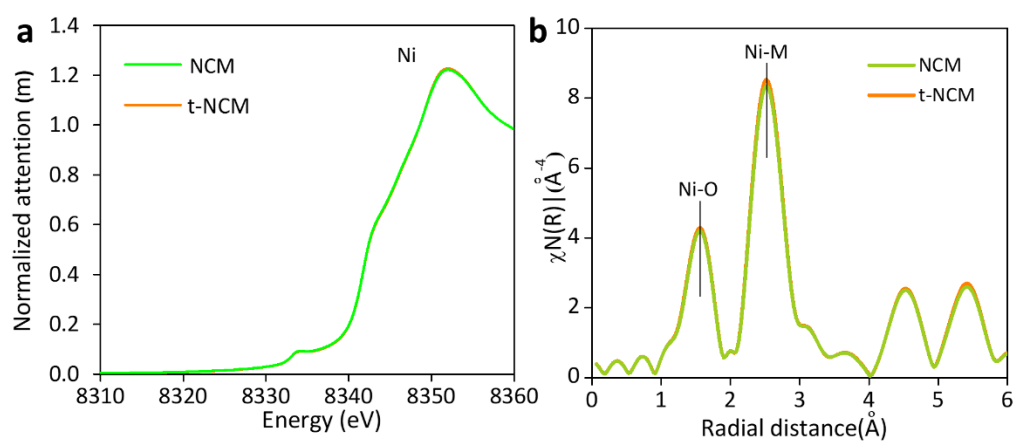

**Supplementary Figure 7. Surface structure of NCM and t-NCM. a and b** Ni K-edge XANES and EXAFS spectra of NCM and t-NCM crystals.

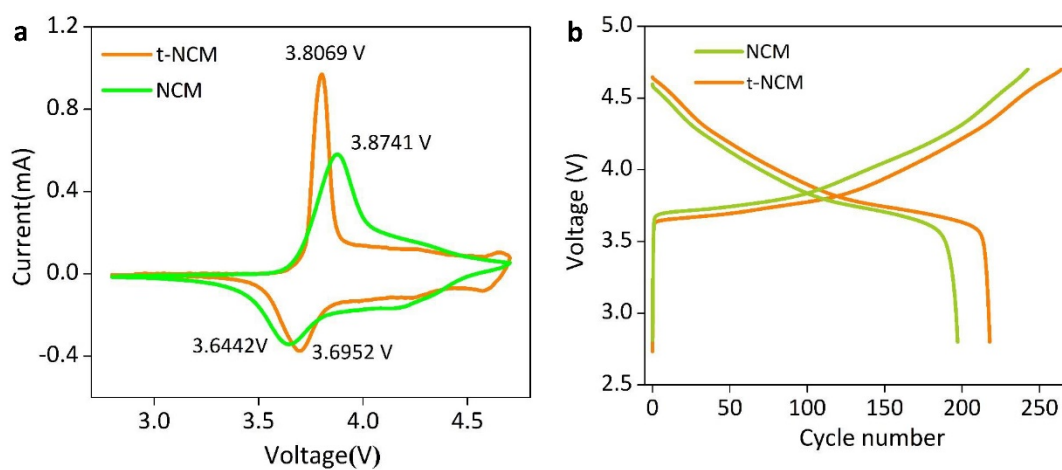

**Supplementary Figure 8. First-cycle electrochemical performance.** **a** Cyclic voltammograms at a scan rate of 0.1 mV s<sup>-1</sup> for NCM and t-NCM. **b** Initial charge/discharge curves of NCM and t-NCM at 0.1 C.

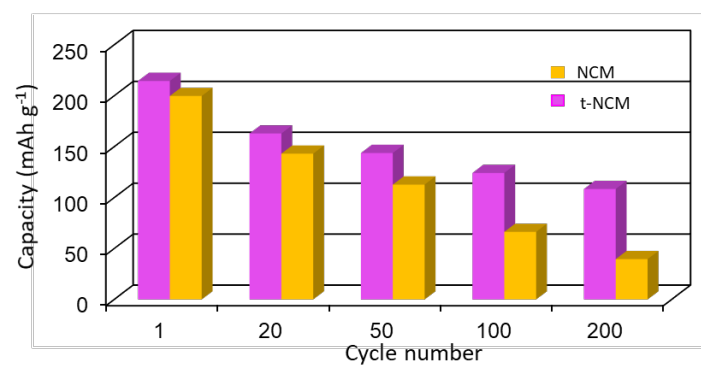

**Supplementary Figure 9. Capacity performance of NCM and t-NCM.** Discharge capacity of NCM and t-NCM after 1 cycle, 20 cycles, 50 cycles, 100 cycles, and 200 cycles.

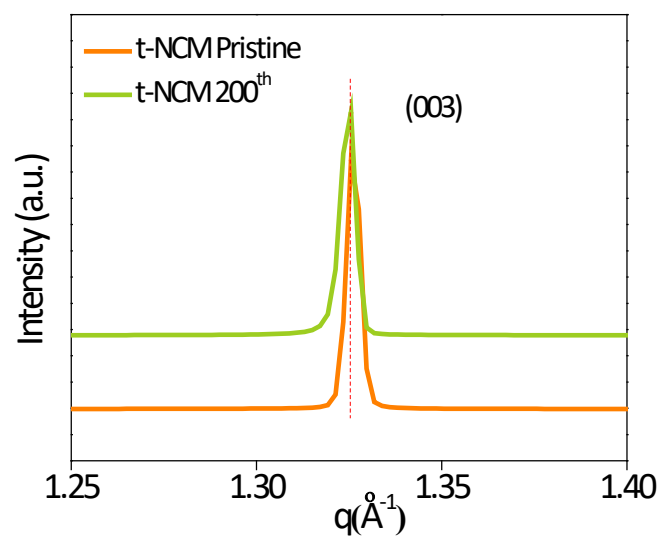

**Supplementary Figure 10. Crystal structure stability of t-NCM.** Synchrotron XRD signals for t-NCM samples. (003) peak shift for cycled sample).

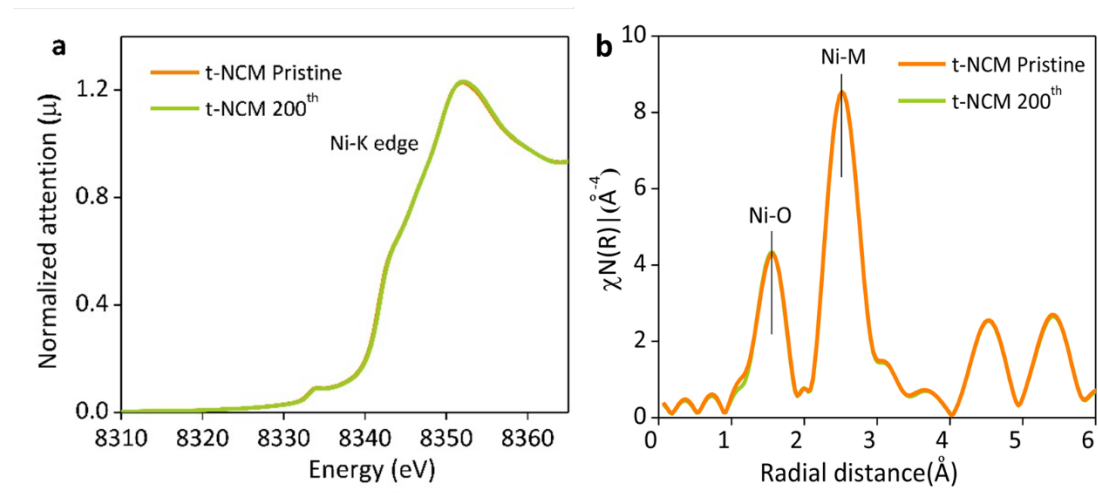

**Supplementary Figure 11. Surface structure stability of t-NCM. a and b** Ni K-edge XANES and EXAFS spectra of pristine and cycled t-NCM crystals.

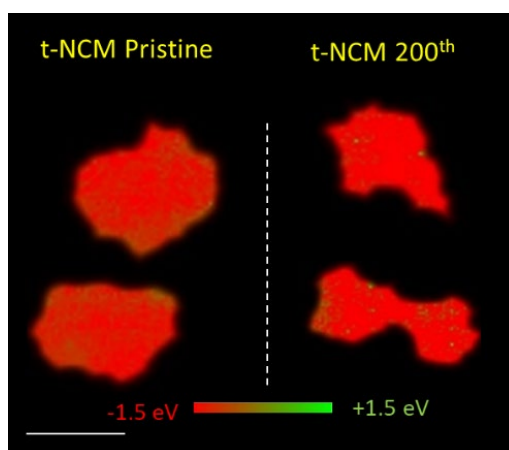

**Supplementary Figure 12. Phase distribution analysis of pristine and cycled t-NCM.** Ex-situ 2D

TXM of pristine and cycled t-NCM. Scale bar 4  $\mu\text{m}$ .

**Supplementary Table 1.** Atom coordinates and displacement parameters from NCM structure refinement results

| NCM                   |    |             |   |        |               |        |
|-----------------------|----|-------------|---|--------|---------------|--------|
| Site                  | Np | x           | y | z      | Atom          | Occ    |
| M                     | 3a | 0           | 0 | 0.5    | Mn            | 0.1739 |
|                       |    | 0           | 0 | 0      | Ni            | 0.6185 |
|                       |    | 0           | 0 | 0.5    | Co            | 0.1739 |
|                       |    | 0           | 0 | 0      | Li            | 0.8311 |
| Li                    | 3b | 0           | 0 | 0.5    | Li            | 0.0899 |
|                       |    |             |   |        | Ni            | 0.0892 |
| O                     | 6c | 0           | 0 | 0.2941 | O             | 0.9831 |
| a=2.8676 Å            |    | c=14.2077 Å |   |        | I(003)/I(104) |        |
| R <sub>wp</sub> =2.5% |    |             |   |        | 1.56          |        |

**Supplementary Table 2.** Atom coordinates and displacement parameters from t-NCM structure refinement results.

| <b>t-NCM</b>          |    |             |   |        |               |        |
|-----------------------|----|-------------|---|--------|---------------|--------|
| Site                  | Np | x           | y | z      | Atom          | Occ    |
| M                     | 3a | 0           | 0 | 0.5    | Mn            | 0.1902 |
|                       |    | 0           | 0 | 0      | Ni            | 0.6521 |
|                       |    | 0           | 0 | 0.5    | Co            | 0.1902 |
|                       |    | 0           | 0 | 0      | Li            | 0.0693 |
| Li                    | 3b | 0           | 0 | 0.5    | Li            | 0.8497 |
|                       |    |             |   |        | Ni            | 0.0692 |
| O                     | 6c | 0           | 0 | 0.2941 | O             | 0.9587 |
| a=2.8679 Å            |    | c=14.2128 Å |   |        | I(003)/I(104) |        |
| R <sub>wp</sub> =2.5% |    |             |   |        | 1.79          |        |
